1                    Intracellular Group A *Streptococcus* induces Golgi fragmentation

2                    to impair host defenses through Streptolysin O and NAD-glycohydrolase

3

4    Takashi Nozawa<sup>1,2</sup>, Junpei Iibushi<sup>1,2</sup>, Hirotaka Toh<sup>1</sup>, Atsuko Minowa-Nozawa<sup>1</sup>, Kazunori

5    Murase<sup>1</sup>, Chihiro Aikawa<sup>1</sup>, Ichiro Nakagawa<sup>1\*</sup>

6

7    <sup>1</sup>Department of Microbiology, Graduate School of Medicine, Kyoto University, Sakyo-ku,

8    Kyoto, Japan.

9    <sup>2</sup>These authors contributed equally.

10

11    \*Corresponding author

12    E-mail: nakagawa.ichiro.7r@kyoto-u.ac.jp (IN)

13

14

## 15 **Abstract**

16 Group A *Streptococcus* (GAS; *Streptococcus pyogenes*) is a major human pathogen that  
17 causes streptococcal pharyngitis, skin and soft-tissue infections, and life-threatening  
18 conditions such as streptococcal toxic-shock syndrome. During infection, GAS not only  
19 invades diverse host cells, but also injects effector proteins such as NAD-glycohydrolase  
20 (Nga) into the host cells through a streptolysin O (SLO)-dependent mechanism without  
21 invading the cells; Nga and SLO are two major virulence factors that are associated with  
22 increased bacterial virulence. Here, we have shown that the invading GAS induces  
23 fragmentation of the Golgi complex and inhibits anterograde transport in the infected host  
24 cells through the secreted toxins SLO and Nga. GAS infection-induced Golgi fragmentation  
25 required both bacterial invasion and SLO-mediated Nga translocation into the host cytosol.  
26 The cellular Golgi network is critical for the sorting of surface molecules and thus is essential  
27 for epithelial barrier integrity and the immune response of macrophages to pathogens. In  
28 epithelial cells, inhibition of anterograde trafficking by invading GAS and Nga resulted in the  
29 redistribution of E-cadherin to the cytosol and an increase in bacterial translocation across the  
30 epithelial barrier. Moreover, in macrophages, interleukin-8 secretion in response to GAS  
31 infection was found to be suppressed by intracellular GAS and Nga. Our findings reveal a  
32 previously undescribed bacterial invasion-dependent function of Nga as well as a previously  
33 unrecognized GAS-host interaction that is associated GAS pathogenesis.

## 34 **Importance**

35 Two prominent virulence factors of GAS, SLO and Nga, have been established to be linked to  
36 enhanced pathogenicity of prevalent GAS strains. Recent advances show that SLO and Nga  
37 are important for intracellular survival of GAS in epithelial cells and macrophages. Here, we  
38 found that invading GAS disrupt the Golgi complex in host cells by SLO and Nga. We  
39 showed that GAS-induced Golgi fragmentation requires bacterial invasion into host cells,  
40 SLO pore-formation activity, and Nga NADase activity. GAS-induced Golgi fragmentation  
41 resulted in the impairment of epithelial barrier and chemokine secretion in macrophages. This  
42 immune inhibition property of SLO and Nga by intracellular GAS indicates that the invasion  
43 of GAS is associated with virulence exerted by SLO and Nga.

44

## 45 **Introduction**

46 Group A *Streptococcus* (GAS; *Streptococcus pyogenes*) is a human-specific pathogen  
47 responsible for diverse diseases, ranging from pharyngitis and impetigo to life-threatening  
48 conditions such as necrotizing fasciitis and streptococcal toxic-shock syndrome (STSS) in  
49 which mortality rates are 30%–70% even with immediate antibiotic therapy and intensive care  
50 [1]. Therefore, GAS species are commonly referred to as “killer bacteria” or “flesh-eating  
51 bacteria,” and the ability of GAS to spread rapidly at the infection site and disseminate  
52 systemically indicates that the pathogen possesses robust mechanisms to resist the human  
53 innate immune response.

54 The initial sites of GAS infection are the pharyngeal epithelia and the keratinocytes,  
55 and the pathogen invades deeper tissues through the paracellular pathway by degrading the  
56 junctional proteins. Although GAS is commonly regarded as an extracellular pathogen, GAS  
57 can invade epithelial cells, endothelial cells, and macrophages, and this cellular invasion has  
58 been reported to be associated with GAS pathogenesis [2-5]. However, several GAS strains  
59 excluding certain isolates are degraded through the endosomal pathway or autophagy and  
60 cannot survive for long periods inside the epithelial cells [6-11], and the importance of GAS  
61 invasion into host cells remains incompletely elucidated.

62 Recent transcriptome evidence has revealed that highly virulent GAS strains exhibit

63 enhanced expression of two toxins, streptolysin O (SLO) and NAD-glycohydrolase (Nga)  
64 [12-14], which emphasizes a role for these toxins in GAS pathogenesis. SLO is a member of  
65 the family of cholesterol-dependent cytolysins that bind to the cholesterol-containing  
66 membranes, oligomerize, and insert into the lipid bilayer to form pores [15-17]. SLO not only  
67 induces the necrosis of neutrophils through pore formation [17,18], but also translocates the  
68 effector protein Nga into the host cytosol in a pore-formation independent manner and  
69 thereby promotes intracellular survival in macrophages and epithelial cells [19-21]. Nga  
70 hydrolyzes NAD into nicotinamide and ADP-ribose and thus depletes intracellular NAD  
71 pools and causes ATP depletion in cells. Accordingly, Nga has been reported to inhibit the  
72 acidification of phagosomes or autolysosomes potentially through ATP depletion in  
73 macrophages and keratinocytes [9,22]. Moreover, Nga inhibits the canonical autophagy  
74 pathway to promote bacterial survival in epithelial cells [23], Nga extracellularly inhibits  
75 interleukin (IL)-1 $\beta$  production [21], and nicotinamide potently inhibits the secretion of  
76 proinflammatory cytokines from monocytes [24]. These lines of evidence have established  
77 that SLO and Nga enable GAS to persist within host cells and modulate immune responses,  
78 and these effects are considered to be exerted by Nga activity itself.

79 Pathogenic bacteria evade host defenses by subverting the host signaling pathways  
80 through several distinct and sophisticated mechanisms [25,26]. For example, *Legionella*  
81 *pneumophila*, *Chlamydia trachomatis*, and *Burkholderia thailandensis* secrete the

82 SET-domain-containing proteins that methylate histones to alter the chromatin landscape of  
83 the host cell [27-29] and thus promote the intracellular proliferation of bacteria. *Salmonella*  
84 Typhimurium, *Legionella* spp., and *Brucella* spp. modulate host membrane dynamics to allow  
85 the bacteria to form replication-permissive vacuoles [25]. Enteropathogenic *Escherichia coli*  
86 and *Shigella flexneri* target the Golgi network, the ER, and the eukaryotic secretory pathway  
87 to suppress the host defenses [30,31]. Here, to uncover the previously unrecognized GAS-host  
88 interactions, we examined the organelle morphology in host cells during GAS infection,  
89 which revealed that GAS infection triggers the fragmentation of the Golgi complex. We  
90 determined that SLO and Nga were responsible for this effect, and further that both  
91 SLO-mediated Nga translocation and bacterial invasion into host cells were required for  
92 disrupting the Golgi network. Inhibition of the Golgi network resulted in the loss of not only  
93 epithelial integrity, but also IL-8 secretion by macrophages in response to GAS infection.

94

95

96

## 97 **Results**

### 98 **Golgi apparatus is fragmented during GAS infection**

99 Because intracellular signaling and vesicular trafficking are closely associated with organelles,  
100 disruptions of host functions frequently result in alterations of the organelle morphology,  
101 Therefore, we examined the mechanism by which GAS infection affects the intracellular  
102 vesicular or signaling networks: We infected the HeLa cells with GAS JRS4 strain, an M6  
103 strain that efficiently invades host cells, immunostained the cells for a series of organelle  
104 marker proteins, and examined and compared the morphology of the mitochondria, ER,  
105 *cis*-Golgi, and *trans*-Golgi before and after infection. Notably, the infection produced overt  
106 morphological changes in the mitochondria and in the *cis/trans*-Golgi (Fig. S1). During GAS  
107 infection, the normal tubular network of the mitochondria was fragmented into short rods or  
108 spheres, and the typical ribbon-like structure of the Golgi complex was also fragmented into  
109 punctate structures and dispersed throughout the cytoplasm (Fig. S1). We have previously  
110 reported that GAS invasion triggers apoptotic signaling, which causes mitochondrial  
111 fragmentation [32]. Thus, in the present study we examined the Golgi fragmentation during  
112 GAS infection in more detail. To test whether this infection-induced Golgi fragmentation was  
113 observed in different cell types, we used GAS JRS4 for infecting the lung epithelial cells  
114 (A549 cells), the human keratinocytes (HaCat cells), the primary dermal keratinocytes  
115 (normal human epidermal keratinocytes; NHEKs), the human umbilical vein endothelial cells

116 (HUVECs), and a human monocyte leukemia cell line (THP-1). JRS4 infection fragmented  
117 the Golgi structures, which then appeared dispersed throughout the cytoplasm in all types of  
118 the cells tested (Fig. 1A). We also infected these cells with two other GAS strains: NIH45, a  
119 serotype M28 and an invasive strain isolated from an STSS patient; and 4944, an epidemic  
120 serotype M89 clade-3 strain. Both the GAS strains also clearly caused Golgi fragmentation in  
121 all the cells examined (Fig. 1A).

122 To quantify the aforementioned phenotype, we measured the number and the area of  
123 Golgi fragments positive for the marker GM130; we found that the JRS4-infected cells  
124 harbored >20 Golgi elements, each with an area of  $0.3 \mu\text{m}^2$ – $0.6 \mu\text{m}^2$  (Fig. 1B). We next  
125 defined cells containing >15 Golgi elements featuring an area of  $1.0 \mu\text{m}^2$  as the  
126 Golgi-fragmented cells, and we found that the Golgi-fragmentation efficiencies were similar  
127 among the GAS strains (Fig. 1C); >90% of the infected HeLa cells, the HUVECs, and the  
128 THP-1 cells exhibited Golgi fragmentation at 4 h post-infection, whereas 40%–60% of the  
129 HaCat and the A549 cells and the NHEKs showed Golgi fragmentation (Fig. 1C).

130 To examine the time course of the changes in the Golgi apparatus structure during  
131 GAS infection, we expressed the EmGFP-tagged FAPP1 (a Golgi-resident protein) in cells  
132 and performed time-lapse imaging during the infection. In live-cell microscopy, the Golgi  
133 fragmentation process was detected at 2–3 h post-infection (Fig. 1D).

134 Golgi fragmentation has been reported in apoptotic cells [33]. Thus, to examine



135 whether the infection-induced fragmentation here was caused by apoptotic signaling, we  
136 inhibited apoptotic signaling by overexpressing the antiapoptotic protein Bcl-2 [34]; ~90% of  
137 the Bcl-2-expressing GAS-infected cells exhibited Golgi fragmentation (Fig. S2A). Moreover,  
138 this fragmentation was also not inhibited when infected cells were treated with the  
139 pan-caspase inhibitor Z-VAD-FMK (an inflammatory-caspase inhibitor) (Fig. S2B). These  
140 results suggest that apoptotic signaling may not be involved in the Golgi fragmentation that  
141 occurs during GAS infection. Collectively, our findings suggest that GAS infection trigger the  
142 fragmentation of the Golgi apparatus in various types of human cells.

#### 143 **SLO and Nga are critical for GAS-induced Golgi fragmentation**

144 Pathogenic bacteria inject virulence effector proteins into the host cells to modulate host  
145 cellular processes. GAS can deliver effector proteins across the host plasma membrane or the  
146 endosomal membrane to modulate host signaling by cytolysin-mediated translocation (CMT)  
147 that uses pore-forming cytolysin SLO. Therefore, to examine whether SLO functions in the  
148 infection-induced Golgi fragmentation described above, we infected the HeLa cells with a  
149 SLO-deficient mutant ( $\Delta slo$ ). Infection with JRS4  $\Delta slo$  did not induce Golgi fragmentation,  
150 whereas complementation with the gene *slo* completely rescued the phenotype (Fig. 2A and  
151 2B). Moreover, JRS4 SLO<sup>Y255A</sup>, a mutant that lacks the pore-forming activity of SLO [20],  
152 failed to induce Golgi fragmentation (Fig. 2A and 2B), which indicates that GAS-induced  
153 Golgi fragmentation involves the pore-forming activity of SLO during infection.

154 SLO is expressed from an operon that also encodes Nga, SLO is necessary for Nga  
155 translocation into the host cells [19]. To ascertain whether Nga was also required for  
156 GAS-induced Golgi fragmentation, or whether SLO pore-forming activity directly triggered  
157 the fragmentation, we examined the Golgi morphology in the cells infected with JRS4  $\Delta nga$   
158 and  $\Delta nga::nga$  (*nga*-complemented strain). The Golgi structures in the  $\Delta nga$ -infected cells  
159 but not the  $\Delta nga::nga$ -infected cells were found to be compact, and quantification of the  
160 Golgi signals indicated that *nga* was critical for GAS-induced Golgi fragmentation (Fig. 2A  
161 and 2B). We also confirmed that SLO and Nga were crucial for the Golgi fragmentation  
162 induced by the strain NIH35 (Fig. S3A and S3B).

163 To test whether the NADase activity of Nga was responsible for the Golgi  
164 fragmentation, we infected cells with the strain JRS4 Nga<sup>R289K/G330D</sup>; the mutations in Nga in  
165 the present study abolished the NADase activity of the effector [35]. Although JRS4  
166 Nga<sup>R289K/G330D</sup> can invade the host cytosol [23], we observed no alteration of the Golgi  
167 structure during JRS4 Nga<sup>R289K/G330D</sup> infection (Fig. 2A and 2B). Taken together, these data  
168 indicate that SLO pore-forming activity and Nga NADase activity are required for  
169 GAS-induced Golgi fragmentation.

## 170 **GAS invasion is required for Nga-mediated Golgi fragmentation during infection**

171 We next examined whether Golgi fragmentation was triggered by extracellular GAS. Because

172 GAS JRS4 requires fibronectin-binding protein (FBP) for invading host cells [36], we  
173 constructed the strain JRS4  $\Delta fbp$  and infected the HeLa cells with this mutant; moreover, to  
174 monitor GAS invasion into the host cytosol, we expressed mCherry-Galectin-3, which serves  
175 as a marker of damaged vacuoles when invasive pathogens escape into the cytosol [37]. Our  
176 results confirmed that JRS4  $\Delta fbp$  were unable to invade the HeLa cells (Fig. 3A). Next, we  
177 tested whether JRS4  $\Delta fbp$  translocates Nga into the cytosol by analyzing NADase activity,  
178 assessed based on the NAD consumption, in the cytosol of the HeLa cells after infection. As  
179 hypothesized, after infection with the JRS4 wild-type and the  $\Delta fbp$  strains, we measured  
180 comparable levels of NADase activity in the cytosol of the HeLa cells, which demonstrated  
181 that Nga was translocated across the host cell membrane even during infection with JRS4  
182  $\Delta fbp$  (Fig. 3B). Unexpectedly, however, JRS4  $\Delta fbp$  failed to induce Golgi fragmentation (Fig.  
183 3C). These results suggested that Golgi fragmentation require not only SLO secretion and  
184 Nga translocation into the cytosol, but also require GAS invasion into the host cells.

185 To exclude the possibility that FBP itself may be critical for the signaling that  
186 induces Nga-mediated Golgi fragmentation, we treated the cells with cytochalasin D (cytD) to  
187 inhibit GAS invasion; cytD treatment does not affect SLO-mediated translocation of Nga [21].  
188 Notably, cytD treatment markedly suppressed Golgi fragmentation during JRS4 infection (Fig.  
189 S4). Together, these results showed that both GAS invasion and SLO-mediated injection of  
190 Nga into the host cells were critical for GAS-induced Golgi fragmentation.

## 191 **GAS impairs anterograde transport pathway**

192 The Golgi apparatus functions in mediating protein and lipid modifications, transport, and  
193 sorting. To assess whether the post-Golgi secretion pathway was inhibited by GAS, we  
194 examined anterograde transport by using the RUSH (Retention Using Selective Hooks)  
195 system [38]. In our assay, E-cadherin was fused to a streptavidin-binding peptide (SBP) and  
196 EGFP and coexpressed with Streptavidin-KDEL, which localizes in the ER. Under normal  
197 conditions, interaction of the SBP-EGFP-E-cadherin with Streptavidin-KDEL in the ER  
198 prevented the transport of the fusion protein to the plasma membrane (Fig. S5). However,  
199 after the addition of biotin, which competes with the SBP tag for streptavidin binding, the  
200 SBP-EGFP-E-cadherin was released from the ER and transported to the plasma membrane  
201 through the Golgi complex in the non-infected cells, and the E-cadherin that was normally  
202 trafficked to the plasma membrane was detected by immunostaining for EGFP without  
203 membrane permeabilization (Fig. 4A). By contrast, in the JRS4-infected cells, the  
204 SBP-EGFP-E-cadherin exhibited punctate localization and the surface-EGFP signal was  
205 rarely detected (Fig. 4A). Quantification of the surface-EGFP signal revealed that anterograde  
206 trafficking of E-cadherin was abolished in the JRS4-infected cells (Fig. 4B). We also infected  
207 cells with  $\Delta slo$ ,  $\Delta nga$ ,  $\Delta nga::nga$ , and  $Nga^{R289K/G330D}$  mutants, and we found that while  $\Delta slo$ ,  
208  $\Delta nga$ , and  $Nga^{R289K/G330D}$  did not affect anterograde trafficking,  $\Delta nga::nga$  infection inhibited  
209 the trafficking as effectively as that by the JRS4 wild-type infection (Fig. 4A and 4B).

210 Collectively, these results suggest that the Golgi fragmentation is caused by the invading GAS  
211 and the effector Nga results in the defect in the host-cell anterograde trafficking.

### 212 **Invading GAS and effector Nga disrupt epithelial integrity**

213 E-cadherin is critical for the cell-cell adhesion that holds epithelial cells tightly together, and  
214 thus E-cadherin is a crucial molecule for the maintenance of the epithelial barrier. GAS can  
215 translocate across epithelial barriers by degrading junctional proteins, including E-cadherin  
216 [39]. Therefore, we examined whether the inhibition of anterograde trafficking by Nga affects  
217 E-cadherin localization and the ability of GAS to translocate across epithelial monolayers.  
218 Because the GAS protease SpeB degrades E-cadherin, we used a JRS4 strain that was  
219 defective in SpeB expression. Immunostaining of the HaCat cells revealed that while  
220 E-cadherin was confined to the cell membrane in the non-infected cells and in cells infected  
221 with the strain Nga<sup>R289K/G330D</sup>, E-cadherin was present in substantial amounts in the cytoplasm  
222 in the JRS4-infected cells (Fig. 5A); this result suggests that the trafficking of endogenous  
223 E-cadherin to the cell membrane may be impaired by the Nga derived from the invading GAS.  
224 Furthermore, the HaCat cells treated with brefeldin A (BFA), which inhibits ARF and induces  
225 Golgi fragmentation [40], also exhibited E-cadherin redistribution similar to that induced by a  
226 JRS4 infection (Fig. 5A). We also examined the total E-cadherin level in cells and found that  
227 JRS4 infection did not affect the cellular E-cadherin amounts (Fig. 5B). These results suggest  
228 that Nga may not degrade E-cadherin but may alter the subcellular localization of E-cadherin

229 during GAS infection.

230           Redistribution of E-cadherin in the GAS-infected cells may increase bacterial  
231 translocation through the paracellular pathway. Because the HaCat, the A549, and the HeLa  
232 cells exhibit unstable junctional integrity, as indicated by their measured transepithelial  
233 electrical resistance (TER) [41], these epithelial cells are not suitable for assessing GAS  
234 translocation. Thus, for assaying GAS translocation, we selected the polarized Caco-2 cells,  
235 which are widely used as an *in vitro* model of the epithelial barrier and have been previously  
236 used in experiments on GAS translocation [39,42]. We confirmed that GAS infection induced  
237 Golgi fragmentation even in Caco-2 monolayers (Fig. S6). The apical surface of the Caco-2  
238 monolayers was infected with either the JRS4 wild-type or the JRS4  $\Delta slo$ ,  $\Delta nga$ ,  $\Delta nga::nga$ ,  
239 or  $Nga^{R289K/G330D}$  mutant for 1 h, and the bacteriostatic agent trimethoprim was added to  
240 inhibit the additional growth of extracellular bacteria and translocated bacteria. At 6 h  
241 post-infection, translocated bacteria were examined using the colony formation assay.  
242 Relative to the JRS4 wild-type, the mutants  $\Delta slo$ ,  $\Delta nga$ , and  $Nga^{R289K/G330D}$  exhibited  
243 markedly diminished translocation efficiency, whereas  $\Delta nga::nga$  showed comparable  
244 translocation efficiency (Fig. 5C). These results suggest that SLO and Nga facilitate GAS  
245 translocation across epithelial monolayers, perhaps by disrupting intracellular trafficking.

#### 246 **Invading GAS inhibits IL-8 secretion by using Nga**

247 GAS infection-induced Golgi fragmentation was also observed in the differentiated THP-1

248 cells (Fig. 1A), and this fragmentation occurred through an Nga-dependent mechanism (Fig.  
249 6A). Because macrophages produce the chemokine IL-8 in response to bacterial infection, we  
250 next determined whether invading GAS inhibited IL-8 secretion by using Nga. The  
251 differentiated THP-1 cells secreted IL-8 in response to infection by  $\Delta slo$ ,  $\Delta nga$ , and  
252 Nga<sup>R289K/G330D</sup> but not JRS4 wild-type or  $\Delta nga::nga$  (Fig. 6B), which suggests that SLO and  
253 Nga may inhibit IL-8 secretion by macrophages. Moreover, the invasive GAS strain NIH35  
254 blocked IL-8 secretion through an SLO- and an Nga-dependent mechanism (Fig. 6B). To  
255 exclude the possibility that the lack of IL-8 production may be due to the suppression of IL-8  
256 expression by SLO and Nga during GAS infection, we examined IL-8 secreted from the  
257 LPS-primed macrophages. The LPS-induced secretion of IL-8 was also inhibited by SLO and  
258 Nga (Fig. 6C), which indicates that the IL-8 secretion process was blocked by Nga during  
259 GAS infection.  
260

## 261 **Discussion**

262 Within bacterium-infected cells, highly complex interactions occur between the host  
263 immune-system components and the bacterial pathogen, and unique molecular dynamics are  
264 frequently observed [25]. We discovered in the present study that GAS invasion induced the  
265 fragmentation of the Golgi complex and inhibited the anterograde transport in an SLO- and an  
266 Nga-dependent manner. Notably, although GAS was found to translocate Nga into the host  
267 cytosol through an SLO-dependent mechanism without invading the host cell, a noninvasive  
268 GAS mutant (JRS4  $\Delta fbp$ ) did not trigger Golgi fragmentation. These results uncovered a  
269 previously unknown function of Nga that this effector protein performs in conjunction with  
270 other effectors and/or the GAS invasion process.

271 To our knowledge, this is the first report that GAS invasion disrupts the Golgi  
272 complex and the post-Golgi secretory pathway. The Golgi complex functions in sorting and  
273 trafficking in the central vacuolar system, and the Golgi apparatus and Golgi-associated  
274 trafficking have been widely reported to be affected by bacterial infection [25]. For example,  
275 during *Shigella* infection, the *Shigella* effector protein IpaB induces cholesterol relocation and  
276 disrupts the Golgi complex and anterograde and retrograde transport [30]; these modifications  
277 lead to the disruption of the host epithelial barrier and are associated with *Shigella*  
278 pathogenesis. We showed in the present study that GAS Nga activity also inhibited  
279 E-cadherin trafficking to the plasma membrane. E-cadherin promoted the cell-to-cell adhesion



280 and integrity of the epithelial barrier, and, accordingly, GAS translocation across epithelial  
281 monolayers was suppressed by the knockout of *slo* or *nga*. Sumitomo et al have reported that  
282 streptolysin S and a cysteine protease contribute to bacterial translocation by perhaps directly  
283 destabilizing intercellular junction proteins such as E-cadherin [39,42,44]. Our data suggest  
284 that invading GAS may support the translocation of extracellular GAS and may facilitate  
285 invasion into deeper tissues.

286 Intriguingly, VirA from *S. flexneri* and EspG from enteropathogenic *E. coli* directly  
287 inactivate Rab1 and disrupt ER-to-Golgi trafficking in cells, and this disruption of the host  
288 secretory pathway results in the inhibition of IL-8 secretion from the infected cells [31]; this  
289 suggests that the impairment of the post-Golgi secretory pathway may be linked to the  
290 attenuation of the inflammatory response. Lethal necrotizing fasciitis caused by GAS is  
291 characterized by the presence of few neutrophils at the infection site, and GAS expresses a  
292 secretory protein that degrades IL-8, which is crucial for neutrophil transmigration and  
293 activation [45-49]. Thus, the absence of anterograde transport in GAS-invaded cells likely  
294 contributes to the GAS pathogenesis. Recently, newly emergent clade-associated strains of  
295 serotype M89 (M89 clade-3 strains) continue to be recognized as a cause of invasive diseases  
296 worldwide, and these strains were found to be genetically acapsular and thus incapable of  
297 producing the hyaluronic acid capsule [13,50]. Because the hyaluronic acid capsule is a  
298 critical virulence factor required for evading phagocytosis or endocytosis by host cells [51,52],

299 dissemination of these strains may be associated with the ability to invade host cells; however,  
300 the precise mechanism by which the acapsular characteristics influence the pathogenesis of  
301 these strains remains unknown. Although the expression of SLO and Nga is enhanced in M89  
302 clade-3 strains, clade-associated and non-clade-associated M89 strains exhibit comparable  
303 intracellular survival [13,50]. Therefore, a previously unrecognized function of the Nga  
304 derived from intracellular GAS that suppresses host immune responses may be associated  
305 with the pathogenicity of the M89 clade-3 strains.

306         GAS invasion and the effector Nga are visibly linked to the morphological and the  
307 functional destruction of the Golgi complex, but the molecular mechanism underlying this  
308 process has remained unclear. Unexpectedly, we found that the GAS JRS4  $\Delta fbp$ , which can  
309 inject Nga into the host cytosol, did not induce Golgi fragmentation; this suggested that Nga  
310 alone may be insufficient for inducing the fragmentation. Although the proteins and/or events  
311 that function in Nga-dependent Golgi fragmentation during GAS invasion remain to be  
312 identified, the fragmentation was observed in all GAS strains tested, which indicates that  
313 certain common characteristics shared among the strains are involved in producing this  
314 phenotype. Our time-lapse imaging analysis revealed that Golgi fragmentation occurred  
315 starting from 2 h–3 h post-infection, which coincides with the time of GAS invasion into the  
316 cytoplasm. Therefore, we hypothesize that the unidentified molecules secreted from GAS  
317 may be involved in the Golgi fragmentation.

318           In summary, our findings indicate that GAS infection disrupts the Golgi-related  
319 network in host cells through the effector Nga and intracellular GAS, which then enables the  
320 translocation of GAS across epithelial barriers and the inhibition of IL-8 secretion by  
321 macrophages *in vitro*. Further investigation aimed at identifying other GAS molecules  
322 responsible for the Golgi fragmentation will enhance our understanding of the pathogenicity  
323 of GAS.

324

## 325 **Methods**

### 326 **Bacterial strains and infection**

327 GAS strains JRS4, NIH35, and 4944 were grown in Todd-Hewitt broth supplemented with  
328 0.2% yeast extract (THY) at 37°C. The isogenic mutant strains JRS4  $\Delta slo$ , JRS4  $\Delta nga$ , JRS4  
329  $\Delta nga::nga$ , and JRS4  $Nga^{R289K/G330D}$  have been described previously [53]. JRS4  $\Delta fbp$ , NIH35  
330  $\Delta slo$ , and NIH35  $\Delta nga$  were constructed using a two-step allele exchange by a method  
331 described previously. Overnight cultures were reinoculated in fresh THY and grown to the  
332 exponential phase (OD<sub>600</sub>: 0.7–0.8), collected by centrifugation, and diluted with cell culture  
333 media before use. Cell cultures in media without antibiotics were infected for 1 h with GAS at  
334 a multiplicity of infection (MOI) of 100. Infected cells were washed with phosphate-buffered  
335 saline (PBS) and treated with 100 µg/mL gentamicin for an appropriate period to kill the  
336 bacteria that were not internalized.

### 337 **Cell culture**

338 HeLa, A549, and THP-1 cell lines were purchased from ATCC; HaCat cell line was a gift  
339 from Dr. Kabashima; HUVECs and NHEKs were purchased from PromoCell; and Caco-2  
340 cells were purchased from the Riken Cell Bank. HeLa and A549 cells were maintained in the  
341 Dulbecco's modified Eagle's medium (Nacalai Tesque) supplemented with 10% fetal bovine  
342 serum (FBS; Gibco) and 50 µg/mL gentamicin (Nacalai Tesque), and the THP-1 cells were  
343 cultured in RPMI 1640 medium (Nacalai Tesque) supplemented with 10% FBS and 50 µg/mL

344 gentamicin. THP-1 cells were differentiated into macrophages by stimulating them with 50  
345 ng/mL phorbol 12-myristate for 72 h. HUVECs were maintained in Endothelial Cell Growth  
346 Medium 2 Kit (PromoCell) supplemented with 10% FBS and 50 µg/mL gentamicin; NHEKs  
347 were cultured in Keratinocyte Growth Medium 2 Kit (PromoCell); and Caco-2 cells were  
348 maintained in minimum essential medium (Wako) supplemented with 10% FBS and 50  
349 µg/mL gentamicin. Cells were incubated in a 5% CO<sub>2</sub> incubator at 37°C.

### 350 **Fluorescence microscopy**

351 Immunofluorescence analysis was performed using these antibodies: anti-TOMM20  
352 (ab78547; Abcam, 1:100), anti-calnexin (610524; BD Transduction Laboratories, 1:100),  
353 anti-GM130 (610822; BD Transduction Laboratories, 1:100), anti-TGN46 (13573-1-AP;  
354 Proteintech, 1:100), anti-GFP (GF200; 04363-24; Nacalai Tesque, 1:100), anti-E-cadherin  
355 (24E10; 3195; Cell Signaling Technology, 1:100), and anti-TOM20 (F-10; sc-17764; Santa  
356 Cruz Biotechnology, 1:100). The secondary antibodies used were anti-mouse or anti-rabbit  
357 IgG conjugated to Alexa Fluor 488 or 594 (#A32723, #A32742, #A32731, #A32740;  
358 Invitrogen). Cells were washed with PBS, fixed with 4% paraformaldehyde (PFA) in PBS (15  
359 min), permeabilized with 0.1% Triton in PBS (10 min), washed with PBS, and blocked (room  
360 temperature, 1 h) with a skim milk solution (5% skim milk, 2.5% goat serum, 2.5% donkey  
361 serum, and 0.1% gelatin in PBS) or a BSA solution (2% BSA and 0.02% sodium azide in  
362 PBS). Next, the cells were probed (room temperature, 1 h) with the primary antibodies diluted

363 in a blocking solution, washed with PBS, and labeled with the appropriate secondary antibody.

364 To visualize bacterial and cellular DNA, cells were stained with

365 4',6-diamidino-2-phenylindole (DAPI; Dojindo). Confocal fluorescence micrographs were

366 acquired using an FV1000 laser-scanning microscope (Olympus).

### 367 **Plasmids, transfection, and reagents**

368 Human FAPP1 cDNA was PCR-amplified from the HeLa cell total mRNA and cloned into

369 pcDNA-6.2/N-EmGFP-DEST (for N-terminal tagging) by using the Gateway (Invitrogen)

370 cloning technology as described previously [54]. Str-KDEL\_TNF-SBP-EGFP was purchased

371 from Addgene (Plasmid #65278). Polyethylenimine (Polysciences) and Lipofectamine 3000

372 (Invitrogen) were used for transfection. Z-VAD-FMK was purchased from Promega.

### 373 **Measurement of NADase activity**

374 HeLa cells seeded at  $1.5 \times 10^5$  cells/well in 24-well plates were infected with the GAS strains

375 for 3 h without killing of extracellular bacteria by gentamicin. Infected HeLa cells were

376 scrapped with chilled PBS, pooled with debris, and lysed in sterile water. The whole-cell

377 lysates were cleared from the membrane fraction by centrifugation at  $20,300 \times g$  for 30 min at

378  $4^\circ\text{C}$  to obtain the cytosolic fraction, which was diluted 2-fold with  $2\times$  PBS.  $\text{NAD}^+$  (Nacalai

379 Tesque) was added to the cytosolic fraction at 1 mM and the mixtures were incubated at  $37^\circ\text{C}$

380 for 3 h. To develop reactions, NaOH (5 N) was added to the reaction mixtures, which were

381 then incubated in the dark at room temperature for 30 min. Samples were analyzed by using a

382 Wallac ARVO SX Multilabel Counter (Perkin Elmer) at 340-nm excitation/460-nm emission  
383 to examine the fluorescence intensity of the remaining NAD<sup>+</sup>. NAD<sup>+</sup> hydrolysis levels in  
384 lysates from the wild-type GAS-infected cells and the non-infected cells were set to  
385 correspond to 100% and 0% NADase activity, respectively.

### 386 **RUSH assay**

387 To assess anterograde transport, the HeLa cells were transfected with the RUSH plasmid  
388 (Streptavidin-KDEL\_E-cadherin-SBP-EGFP), and at 24 h post-transfection, cells were  
389 infected with GAS strains as described above. After infection for 2 h, 40 μM biotin (Nacalai  
390 Tesque) was added to the cells, and after incubation for 1 h, the cells were fixed with 4% PFA  
391 (15 min) and immunostained with anti-GFP antibody without permeabilization. Images were  
392 acquired using confocal microscopy and analyzed using an ImageJ software. Regions  
393 corresponding to the transfected cells were drawn and the average intensity of surface  
394 anti-GFP staining in these regions was determined; >20 cells were analyzed under each  
395 condition and three independent experiments were performed.

### 396 **Translocation assay**

397 Caco-2 cells were seeded at  $2 \times 10^5$  cells/well onto polycarbonate Millicell culture-plate  
398 inserts (12-mm diameter, 3-μm pore size; Millipore) and cultured for 5 days. To determine the  
399 Caco-2-cell monolayer integrity, the TER of the monolayers on the filter was measured using  
400 a Millicell-ERS device (Millipore), and monolayers with measured TER values of 450–500

401  $\Omega/\text{cm}^2$  were used in experiments. After the polarized monolayers were infected for 1 h with  
402 GAS (MOI = 10), the non-adherent bacteria were removed by washing the upper chamber  
403 with PBS, and the medium was switched to medium containing trimethoprim to inhibit the  
404 additional growth of GAS. The ability of GAS to translocate across monolayers was assessed  
405 through quantitative culturing of the medium: Each medium sample obtained from the lower  
406 chamber at 6 h post-infection was serially diluted and plated on THY agar plates to determine  
407 colony forming unit (CFU) values.

#### 408 **Chemokine and cytokine secretion**

409 THP-1 cells were seeded at  $2 \times 10^5$  cells/well in 24-well plates and differentiated for 72 h.  
410 After infection with GAS for 4 h, the supernatant was collected and centrifuged, and the IL-8  
411 released into the supernatant was quantified by using a human IL-8 ELISA kit (Proteintech)  
412 according to manufacturer instructions.

#### 413 **Statistical analysis**

414 Values, including plotted values, represent means  $\pm$  standard error of the mean (SEM). Data  
415 were tested using the two-tailed Student's *t*-test, and  $P < 0.05$  was considered significant ( $*P$   
416  $< 0.05$ ,  $**P < 0.01$ ,  $***P < 0.001$ ,  $****P < 0.0001$ ; ns, not significant). GraphPad Prism 8  
417 was used for statistical analyses.

418

419



420 **References**

- 421 1. Cole JN, Barnett TC, Nizet V, Walker MJ (2011) Molecular insight into invasive group A  
422 streptococcal disease. *Nat Rev Microbiol* 9: 724-736.
- 423 2. Jadoun J, Ozeri V, Burstein E, Skutelsky E, Hanski E, Sela S (1998) Protein F1 is required  
424 for efficient entry of *Streptococcus pyogenes* into epithelial cells. *J Infect Dis* 178:  
425 147-158.
- 426 3. LaPenta D, Rubens C, Chi E, Cleary PP (1994) Group A streptococci efficiently invade  
427 human respiratory epithelial cells. *Proc Natl Acad Sci U S A* 91: 12115-12119.
- 428 4. Burns EH, Jr., Lukomski S, Rurangirwa J, Podbielski A, Musser JM (1998) Genetic  
429 inactivation of the extracellular cysteine protease enhances in vitro internalization of  
430 group A streptococci by human epithelial and endothelial cells. *Microb Pathog* 24:  
431 333-339.
- 432 5. Thulin P, Johansson L, Low DE, Gan BS, Kotb M, McGeer A, et al. (2006) Viable group A  
433 streptococci in macrophages during acute soft tissue infection. *PLoS Med* 3: e53.
- 434 6. Barnett TC, Liebl D, Seymour LM, Gillen CM, Lim JY, Larock CN, et al. (2013) The  
435 Globally Disseminated MIT1 Clone of Group A *Streptococcus* Evades Autophagy for  
436 Intracellular Replication. *Cell Host Microbe* 14: 675-682.
- 437 7. Joubert PE, Meiffren G, Gregoire IP, Pontini G, Richetta C, Flacher M, et al. (2009)

- 438           Autophagy induction by the pathogen receptor CD46. *Cell Host Microbe* 6: 354-366.
- 439   8. Nakagawa I, Amano A, Mizushima N, Yamamoto A, Yamaguchi H, Kamimoto T, et al.  
440           (2004) Autophagy defends cells against invading group A *Streptococcus*. *Science* 306:  
441           1037-1040.
- 442   9. O'Seaghda M, Wessels MR (2013) Streptolysin O and its co-toxin NAD-glycohydrolase  
443           protect group A *Streptococcus* from Xenophagic killing. *PLoS Pathog* 9: e1003394.
- 444   10. Thurston TL, Ryzhakov G, Bloor S, von Muhlinen N, Randow F (2009) The TBK1  
445           adaptor and autophagy receptor NDP52 restricts the proliferation of ubiquitin-coated  
446           bacteria. *Nat Immunol* 10: 1215-1221.
- 447   11. Sakurai A, Maruyama F, Funao J, Nozawa T, Aikawa C, Okahashi N, et al. (2010)  
448           Specific behavior of intracellular *Streptococcus pyogenes* that has undergone  
449           autophagic degradation is associated with bacterial streptolysin O and host small G  
450           proteins Rab5 and Rab7. *J Biol Chem* 285: 22666-22675.
- 451   12. Ikebe T, Ato M, Matsumura T, Hasegawa H, Sata T, Kobayashi K, et al. (2010) Highly  
452           frequent mutations in negative regulators of multiple virulence genes in group A  
453           streptococcal toxic shock syndrome isolates. *PLoS Pathog* 6: e1000832.
- 454   13. Turner CE, Abbott J, Lamagni T, Holden MT, David S, Jones MD, et al. (2015)  
455           Emergence of a New Highly Successful Acapsular Group A *Streptococcus* Clade of  
456           Genotype emm89 in the United Kingdom. *mBio* 6: e00622.

- 457 14. Zhu L, Olsen RJ, Nasser W, Beres SB, Vuopio J, Kristinsson KG, et al. (2015) A  
458 molecular trigger for intercontinental epidemics of group A Streptococcus. *J Clin*  
459 *Invest* 125: 3545-3559.
- 460 15. Bhakdi S, Trantum-Jensen J, Sziegoleit A (1985) Mechanism of membrane damage by  
461 streptolysin-O. *Infect Immun* 47: 52-60.
- 462 16. Alouf JE (2000) Bacterial protein toxins. An overview. *Methods Mol Biol* 145: 1-26.
- 463 17. Heuck AP, Moe PC, Johnson BB (2010) The cholesterol-dependent cytolysin family of  
464 gram-positive bacterial toxins. *Subcell Biochem* 51: 551-577.
- 465 18. Ato M, Ikebe T, Kawabata H, Takemori T, Watanabe H (2008) Incompetence of  
466 neutrophils to invasive group A streptococcus is attributed to induction of plural  
467 virulence factors by dysfunction of a regulator. *PLoS One* 3: e3455.
- 468 19. Madden JC, Ruiz N, Caparon M (2001) Cytolysin-mediated translocation (CMT): a  
469 functional equivalent of type III secretion in gram-positive bacteria. *Cell* 104:  
470 143-152.
- 471 20. Magassa N, Chandrasekaran S, Caparon MG (2010) *Streptococcus pyogenes*  
472 cytolysin-mediated translocation does not require pore formation by streptolysin O.  
473 *EMBO Rep* 11: 400-405.
- 474 21. Hancz D, Westerlund E, Bastiat-Sempe B, Sharma O, Valfridsson C, Meyer L, et al.  
475 (2017) Inhibition of Inflammasome-Dependent Interleukin 1beta Production by

- 476 Streptococcal NAD(+)-Glycohydrolase: Evidence for Extracellular Activity. *mBio* 8.
- 477 22. Bastiat-Sempe B, Love JF, Lomayesva N, Wessels MR (2014) Streptolysin O and  
478 NAD-glycohydrolase prevent phagolysosome acidification and promote group A  
479 streptococcus survival in macrophages. *MBio* 5: e01690-01614.
- 480 23. Toh H, Nozawa T, Minowa-Nozawa A, Hikichi M, Nakajima S, Aikawa C, et al. (2019)  
481 Group A Streptococcus modulates RAB1- and PIK3C3 complex-dependent autophagy.  
482 *Autophagy*: 1-13.
- 483 24. Ungerstedt JS, Blomback M, Soderstrom T (2003) Nicotinamide is a potent inhibitor of  
484 proinflammatory cytokines. *Clin Exp Immunol* 131: 48-52.
- 485 25. Escoll P, Mondino S, Rolando M, Buchrieser C (2016) Targeting of host organelles by  
486 pathogenic bacteria: a sophisticated subversion strategy. *Nat Rev Microbiol* 14: 5-19.
- 487 26. Rolando M, Gomez-Valero L, Buchrieser C (2015) Bacterial remodelling of the host  
488 epigenome: functional role and evolution of effectors methylating host histones. *Cell*  
489 *Microbiol* 17: 1098-1107.
- 490 27. Rolando M, Rusniok C, Margueron R, Buchrieser C (2013) [Host epigenetic targeting by  
491 *Legionella pneumophila*]. *Med Sci (Paris)* 29: 843-845.
- 492 28. Pennini ME, Perrinet S, Dautry-Varsat A, Subtil A (2010) Histone methylation by NUE, a  
493 novel nuclear effector of the intracellular pathogen *Chlamydia trachomatis*. *PLoS*  
494 *Pathog* 6: e1000995.

- 495 29. Li T, Lu Q, Wang G, Xu H, Huang H, Cai T, et al. (2013) SET-domain bacterial effectors  
496 target heterochromatin protein 1 to activate host rDNA transcription. *EMBO Rep* 14:  
497 733-740.
- 498 30. Mounier J, Boncompain G, Senerovic L, Lagache T, Chretien F, Perez F, et al. (2012)  
499 *Shigella* effector IpaB-induced cholesterol relocation disrupts the Golgi complex and  
500 recycling network to inhibit host cell secretion. *Cell Host Microbe* 12: 381-389.
- 501 31. Dong N, Zhu Y, Lu Q, Hu L, Zheng Y, Shao F (2012) Structurally distinct bacterial  
502 TBC-like GAPs link Arf GTPase to Rab1 inactivation to counteract host defenses.  
503 *Cell* 150: 1029-1041.
- 504 32. Nakagawa I, Nakata M, Kawabata S, Hamada S (2001) Cytochrome c-mediated caspase-9  
505 activation triggers apoptosis in *Streptococcus pyogenes*-infected epithelial cells. *Cell*  
506 *Microbiol* 3: 395-405.
- 507 33. Hicks SW, Machamer CE (2005) Golgi structure in stress sensing and apoptosis. *Biochim*  
508 *Biophys Acta* 1744: 406-414.
- 509 34. Aikawa C, Nozawa T, Maruyama F, Tsumoto K, Hamada S, Nakagawa I (2010) Reactive  
510 oxygen species induced by *Streptococcus pyogenes* invasion trigger apoptotic cell  
511 death in infected epithelial cells. *Cell Microbiol* 12: 814-830.
- 512 35. Chandrasekaran S, Ghosh J, Port GC, Koh EI, Caparon MG (2013) Analysis of  
513 polymorphic residues reveals distinct enzymatic and cytotoxic activities of the

- 514 Streptococcus pyogenes NAD<sup>+</sup> glycohydrolase. J Biol Chem 288: 20064-20075.
- 515 36. Molinari G, Talay SR, Valentin-Weigand P, Rohde M, Chhatwal GS (1997) The  
516 fibronectin-binding protein of Streptococcus pyogenes, SfbI, is involved in the  
517 internalization of group A streptococci by epithelial cells. Infect Immun 65:  
518 1357-1363.
- 519 37. Paz I, Sachse M, Dupont N, Mounier J, Cederfur C, Enninga J, et al. (2010) Galectin-3, a  
520 marker for vacuole lysis by invasive pathogens. Cell Microbiol 12: 530-544.
- 521 38. Boncompain G, Divoux S, Gareil N, de Forges H, Lescure A, Latreche L, et al. (2012)  
522 Synchronization of secretory protein traffic in populations of cells. Nat Methods 9:  
523 493-498.
- 524 39. Sumitomo T, Nakata M, Higashino M, Terao Y, Kawabata S (2013) Group A streptococcal  
525 cysteine protease cleaves epithelial junctions and contributes to bacterial translocation.  
526 J Biol Chem 288: 13317-13324.
- 527 40. Lowe SL, Wong SH, Hong W (1996) The mammalian ARF-like protein 1 (Arl1) is  
528 associated with the Golgi complex. J Cell Sci 109 ( Pt 1): 209-220.
- 529 41. Lin A, Loughman JA, Zinselmeyer BH, Miller MJ, Caparon MG (2009) Streptolysin S  
530 inhibits neutrophil recruitment during the early stages of Streptococcus pyogenes  
531 infection. Infect Immun 77: 5190-5201.
- 532 42. Sumitomo T, Nakata M, Higashino M, Jin Y, Terao Y, Fujinaga Y, et al. (2011)

533 Streptolysin S contributes to group A streptococcal translocation across an epithelial  
534 barrier. *J Biol Chem* 286: 2750-2761.

535 43. Roobthaisong A, Aikawa C, Nozawa T, Maruyama F, Nakagawa I (2017) YvqE and  
536 CovRS of Group A Streptococcus Play a Pivotal Role in Viability and Phenotypic  
537 Adaptations to Multiple Environmental Stresses. *PLoS One* 12: e0170612.

538 44. Sumitomo T, Nakata M, Higashino M, Yamaguchi M, Kawabata S (2016) Group A  
539 Streptococcus exploits human plasminogen for bacterial translocation across epithelial  
540 barrier via tricellular tight junctions. *Sci Rep* 7: 20069.

541 45. Kurupati P, Turner CE, Tziona I, Lawrenson RA, Alam FM, Nohadani M, et al. (2010)  
542 Chemokine-cleaving Streptococcus pyogenes protease SpyCEP is necessary and  
543 sufficient for bacterial dissemination within soft tissues and the respiratory tract. *Mol*  
544 *Microbiol* 76: 1387-1397.

545 46. Edwards RJ, Taylor GW, Ferguson M, Murray S, Rendell N, Wrigley A, et al. (2005)  
546 Specific C-terminal cleavage and inactivation of interleukin-8 by invasive disease  
547 isolates of Streptococcus pyogenes. *J Infect Dis* 192: 783-790.

548 47. Soderholm AT, Barnett TC, Korn O, Rivera-Hernandez T, Seymour LM, Schulz BL, et al.  
549 (2018) Group A Streptococcus MIT1 Intracellular Infection of Primary Tonsil  
550 Epithelial Cells Dampens Levels of Secreted IL-8 Through the Action of SpyCEP.  
551 *Front Cell Infect Microbiol* 8: 160.

- 552 48. Zinkernagel AS, Timmer AM, Pence MA, Locke JB, Buchanan JT, Turner CE, et al.  
553 (2008) The IL-8 protease SpyCEP/ScpC of group A Streptococcus promotes resistance  
554 to neutrophil killing. *Cell Host Microbe* 4: 170-178.
- 555 49. Turner CE, Kurupati P, Jones MD, Edwards RJ, Sriskandan S (2009) Emerging role of the  
556 interleukin-8 cleaving enzyme SpyCEP in clinical Streptococcus pyogenes infection. *J*  
557 *Infect Dis* 200: 555-563.
- 558 50. Zhu L, Olsen RJ, Nasser W, de la Riva Morales I, Musser JM (2015) Trading Capsule for  
559 Increased Cytotoxin Production: Contribution to Virulence of a Newly Emerged Clade  
560 of emm89 Streptococcus pyogenes. *mBio* 6: e01378-01315.
- 561 51. Wessels MR, Moses AE, Goldberg JB, DiCesare TJ (1991) Hyaluronic acid capsule is a  
562 virulence factor for mucoid group A streptococci. *Proc Natl Acad Sci U S A* 88:  
563 8317-8321.
- 564 52. Moses AE, Wessels MR, Zalzman K, Alberti S, Natanson-Yaron S, Menes T, et al. (1997)  
565 Relative contributions of hyaluronic acid capsule and M protein to virulence in a  
566 mucoid strain of the group A Streptococcus. *Infect Immun* 65: 64-71.
- 567 53. Toh H, Lin CY, Nakajima S, Aikawa C, Nozawa T, Nakagawa I (2019) Group A  
568 Streptococcus NAD-Glycohydrolase Inhibits Caveolin 1-Mediated Internalization Into  
569 Human Epithelial Cells. *Front Cell Infect Microbiol* 9: 398.
- 570 54. Nozawa T, Aikawa C, Goda A, Maruyama F, Hamada S, Nakagawa I (2012) The small



571 GTPases Rab9A and Rab23 function at distinct steps in autophagy during Group A

572 Streptococcus infection. Cell Microbiol 14: 1149-1165.

573

574

575 **Acknowledgments:**

576 This work was financial support from Grants-in-Aid for Scientific Research (16H05188,  
577 15K15130, 26462776, 17K19552), the Takeda Science Foundation, the Research Program on  
578 Emerging and Re-emerging Infectious Diseases (18fk0108044h0202, 18fk0108073h0001)  
579 and J-PRIDE (18fm0208030h0002) from Japan Agency for Medical Research and  
580 Development, AMED.

581 **Competing interests:**

582 The authors declare that they have no competing interests.

583

584

585 **Figure legends**

586 **Fig. 1 GAS induces Golgi fragmentation in infected host cells.**

587 (A and B) The Golgi structure during GAS infection. Cells were infected with indicated GAS  
588 strains for 4 h, fixed, and immunostained for the Golgi marker GM130 (red). Cellular and  
589 bacterial DNA DNA was stained with DAPI (cyan). Representative confocal images (A) and  
590 quantification of the Golgi and nucleus signals (B). (C) Quantification of the  
591 Golgi-fragmented cells that showed  $> 15$  Golgi elements that is  $< 1 \mu\text{m}^2$ . (D)  
592 EmGFP-FAPP1-expressing HeLa cells were infected with GAS JRS4. Confocal images were  
593 captured at indicated time after infection. Scale bars,  $10 \mu\text{m}$ . Data in B and C represent  
594 individual values (dots) ( $n > 20$  cells per condition) and the mean (magenta line)  $\pm$  SEM of  
595 independent experiments. *P*-values calculated by two-tailed Student's *t*-test.  $**P < 0.01$ ,  $***P$   
596  $< 0.001$ ,  $****P < 0.0001$ ; ns, not significant.

597 **Fig. 2 The Golgi fragmentation during GAS infection requires SLO and Nga.**

598 (A and B) HeLa cells were infected with indicated GAS strains for 4 h, fixed, and  
599 immunostained for GM130 (magenta). Representative confocal images (A), and  
600 quantification of the cells with fragmented Golgi during infection (B). Scale bars,  $10 \mu\text{m}$ .  
601 Data in B represents individual values (dots) ( $n > 20$  cells per condition) and the mean  
602 (magenta line)  $\pm$  SEM of independent experiments. *P*-values calculated by two-tailed  
603 Student's *t*-test.  $****P < 0.0001$ .

604 **Fig. 3 GAS invasion is necessary for Nga-mediated Golgi fragmentation.**

605 (A) HeLa cells transiently expressing mCherry-galectin-3 (GAL3) were infected with JRS4  
606 wild-type or  $\Delta fbp$  mutant for 4 h. mCherry-GAL3-positive  $\Delta fbp$  was not observed. (B)  
607 NADase activity was assessed by measuring NAD consumption in the cytosolic fractions of  
608 infected cells. (C) HeLa cells were infected with indicated GAS strains for 4 h, fixed, and  
609 immunostained for GM130 (magenta). Scale bars, 10  $\mu$ m. Data in B and C represent  
610 individual values (dots) ( $n > 20$  cells per condition) and the mean (magenta line)  $\pm$  SEM of  
611 independent experiments.  $P$ -values calculated by two-tailed Student's  $t$ -test. \*\*\*\* $P < 0.0001$ ;  
612 ns, not significant.

613 **Fig. 4 GAS inhibits anterograde transport through SLO and Nga.**

614 (A) Anterograde trafficking was inhibited in GAS infected cells. HeLa cells expressing  
615 Streptavidin-KDEL and SBP-EGFP-E-cadherin were infected with GAS strains. Cells were  
616 infected with GAS for 2 h, and then incubated for 1 h with biotin to observe the traffic of  
617 SBP-EGFP-E-cadherin to the plasma membrane. Cells were then fixed and the surface  
618 E-cadherin was detected with an anti-GFP (magenta) prior to cell permeabilization. Cellular  
619 and bacterial DNA DNA was stained with DAPI (cyan). Scale bars, 10  $\mu$ m. (B) Quantification  
620 of surface E-cadherin using anti-GFP immunostaining. Average intensity of regions of interest  
621 corresponding to transfected cells was measured. Data in B represents individual values (dots)  
622 ( $n > 20$  cells per condition) and the mean (magenta line)  $\pm$  SEM of independent experiments.

623 *P*-values calculated by two-tailed Student's t-test. \*\*\*\**P* < 0.0001; ns, not significant.

624 **Fig. 5 GAS affects E-cadherin trafficking and translocation of GAS through Nga.**

625 (A) HaCat cells were infected with GAS strains for treated with BFA for 6 h, fixed and  
626 immunostained with anti-E-cadherin (green) and GM130 (magenta). Cellular and bacterial  
627 DNA DNA was stained with DAPI (cyan). Scale bars, 10 μm. (B) Western blotting of  
628 indicated proteins in GAS-infected HaCat cells (6 h). (C) Caco-2 cells were grown on  
629 Millicell filters and then infected with GAS strains at an MOI of 10 for 6 h. Bacterial  
630 translocation was expressed as a percentage of GAS recovered from medium beneath the  
631 monolayer at 6 h after infection. Data in C represents individual values (dots) and the mean  
632 (magenta line) ± SEM of independent experiments. *P*-values calculated by two-tailed  
633 Student's t-test. \*\**P* < 0.01, \*\*\**P* < 0.001; ns, not significant.

634 **Fig. 6 GAS inhibits IL-8 secretion process through SLO and Nga.**

635 (A) Differentiated THP-1 cells were infected with GAS JRS4 strains for 4 h, fixed, and  
636 immunostained with GM130 (magenta). Cellular and bacterial DNA was stained with DAPI  
637 (cyan). Scale bars, 10 μm. (B and C) Non-primed (B) or LPS-primed (C) differentiated  
638 THP-1 cells were infected with GAS strains for 4 h. Supernatants were analyzed for the  
639 secretion of IL-8 by ELISA.

640

641 **Supplementary Fig. 1 GAS infection induces the fragmentation of the Golgi and**

642 **mitochondria.**

643 HeLa cells were infected with GAS JRS4 for 4 h, fixed, and immunostained with indicated  
644 antibodies.

645 **Supplementary Fig. 2 Inhibition of apoptotic signal does not suppress the Golgi**  
646 **fragmentation during GAS infection.**

647 HeLa Bcl-2-expressing cells were infected with GAS JRS4 for 4 h, and immunostained for  
648 GM130. The percentages of cells showing Golgi fragmentation were quantified. Data in **C**  
649 and **E** represent individual values (dots) ( $n > 20$  cells per condition) and the mean (magenta  
650 line)  $\pm$  SEM of independent experiments.

651 **Supplementary Fig. 3 GAS NIH35 strain induces the Golgi fragmentation in a SLO- and**  
652 **Nga-dependent manner.**

653 HeLa cells were infected with NIH35 strains for 4 h, and immunostained for GM130. (**B**) The  
654 percentages of cells showing Golgi fragmentation were quantified. Data in **B** represents  
655 individual values (dots) ( $n > 20$  cells per condition) and the mean (magenta line)  $\pm$  SEM of  
656 independent experiments.

657 **Supplementary Fig. 4 GAS NIH35 strain induces the Golgi fragmentation in a SLO- and**  
658 **Nga-dependent manner.**

659 HeLa cells treated with cytD were infected with GAS JRS4 for 3 h. Cells were  
660 immunostained for GM130. The percentages of cells showing Golgi fragmentation were

661 quantified. Data represent individual values (dots) ( $n > 20$  cells per condition) and the mean  
662 (magenta line)  $\pm$  SEM of independent experiments.

663 **Supplementary Fig. 5 Confocal images of control condition in RUSH assay.**

664 HeLa cells expressing Streptavidin-KDEL and SBP-EGFP-E-cadherin were infected with  
665 GAS strains. Cells were then fixed and the surface E-cadherin was detected with an anti-GFP  
666 (magenta) prior to cell permeabilization. Cellular and bacterial DNA was stained with DAPI  
667 (cyan). Scale bars, 10  $\mu$ m.

668 **Supplementary Fig. 6 GAS infection induced the Golgi fragmentation in Caco-2 cells.**

669 Caco-2 cells were non-infected or infected with JRS4 GAS for 4 h, and immunostained for  
670 GM130. Scale bars, 10  $\mu$ m.

Figure 1

**A**

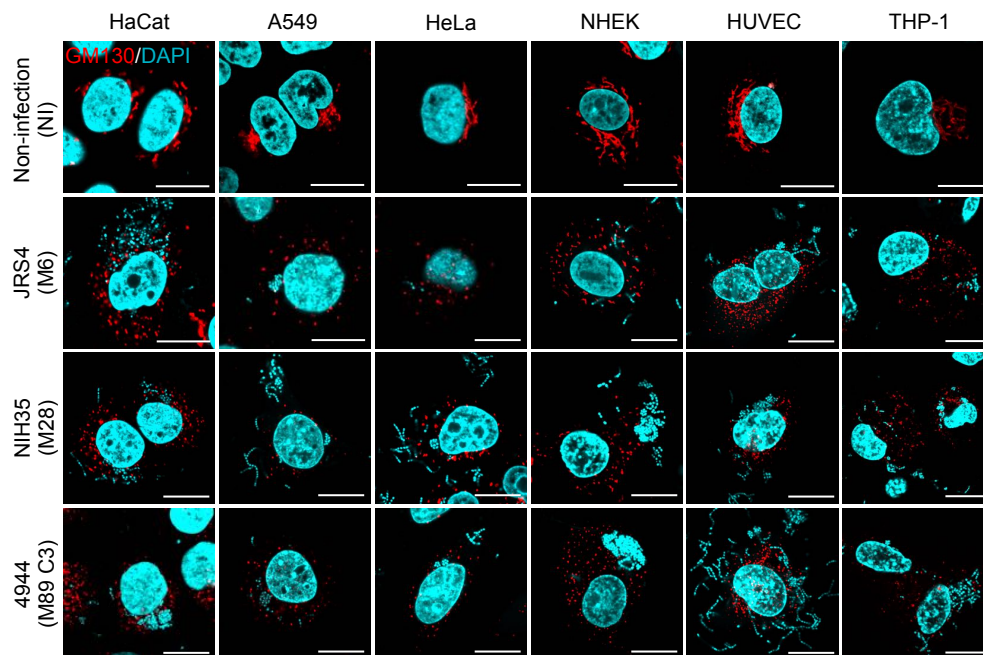

**B**

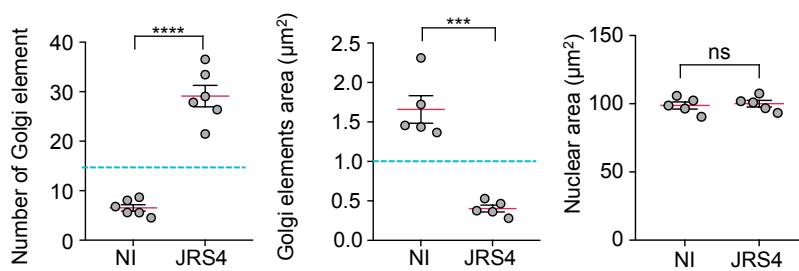

**C**

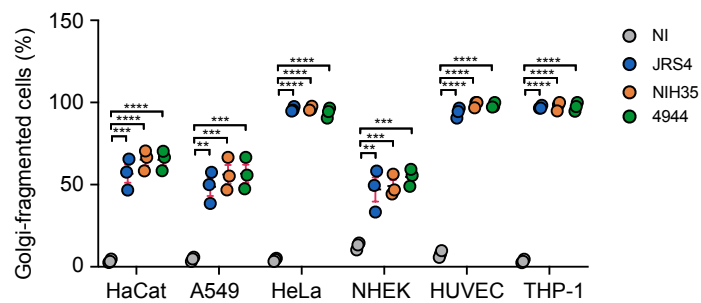

**D**

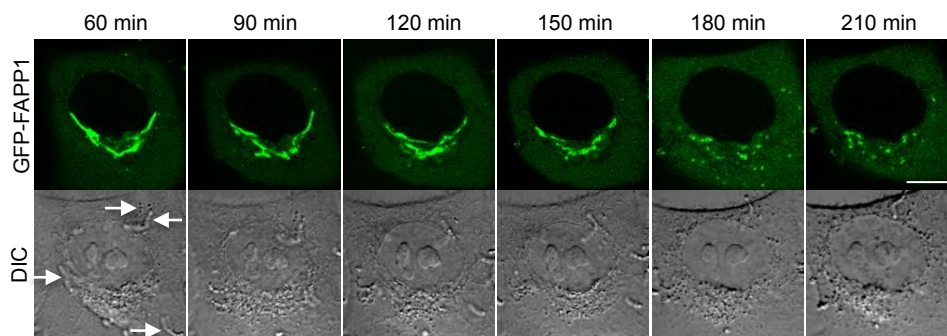



Figure 2

**A**

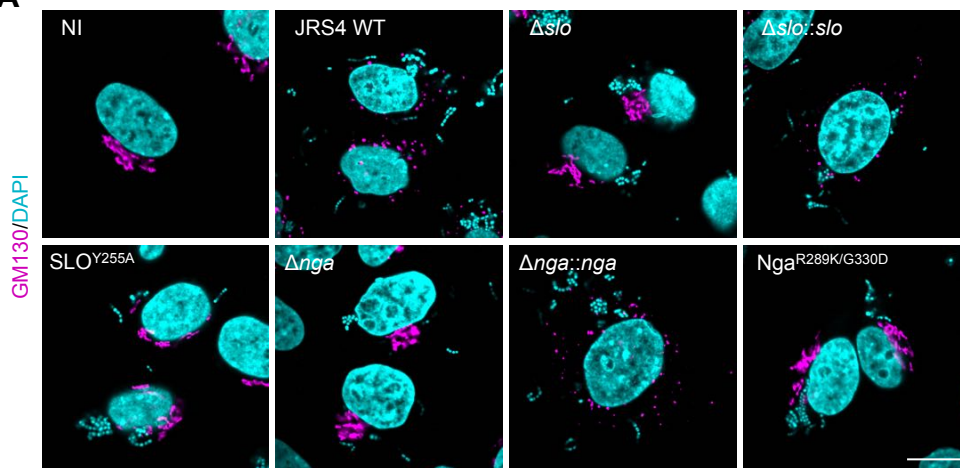

**B**

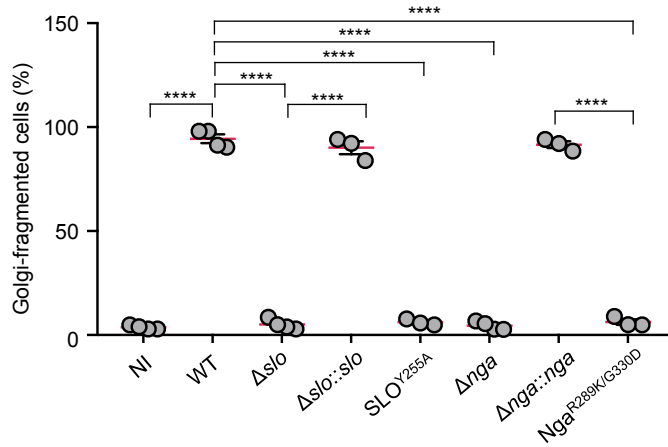

Figure 3

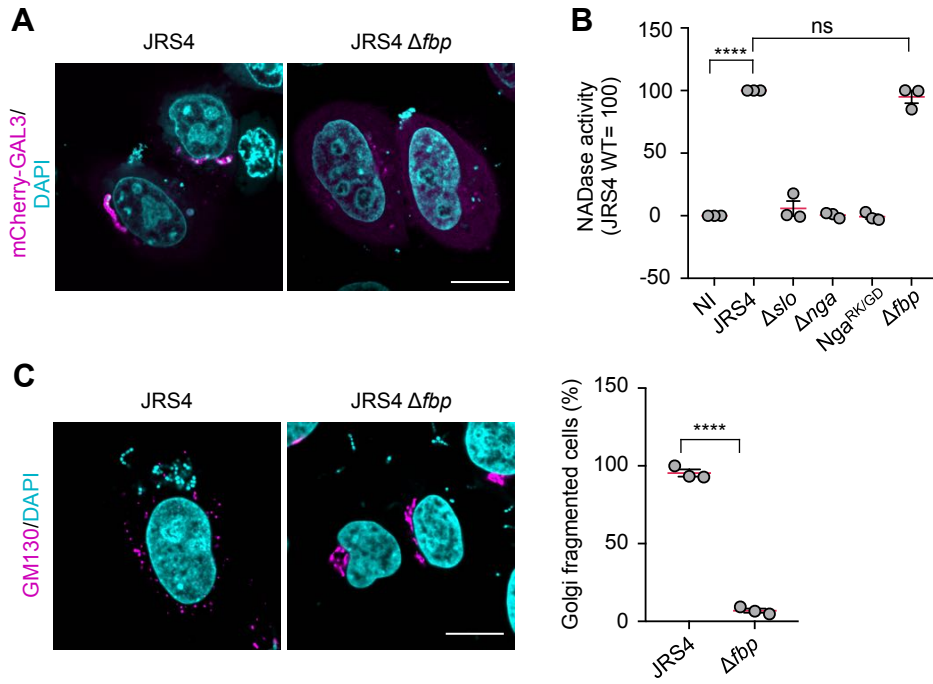

Figure 4

**A**

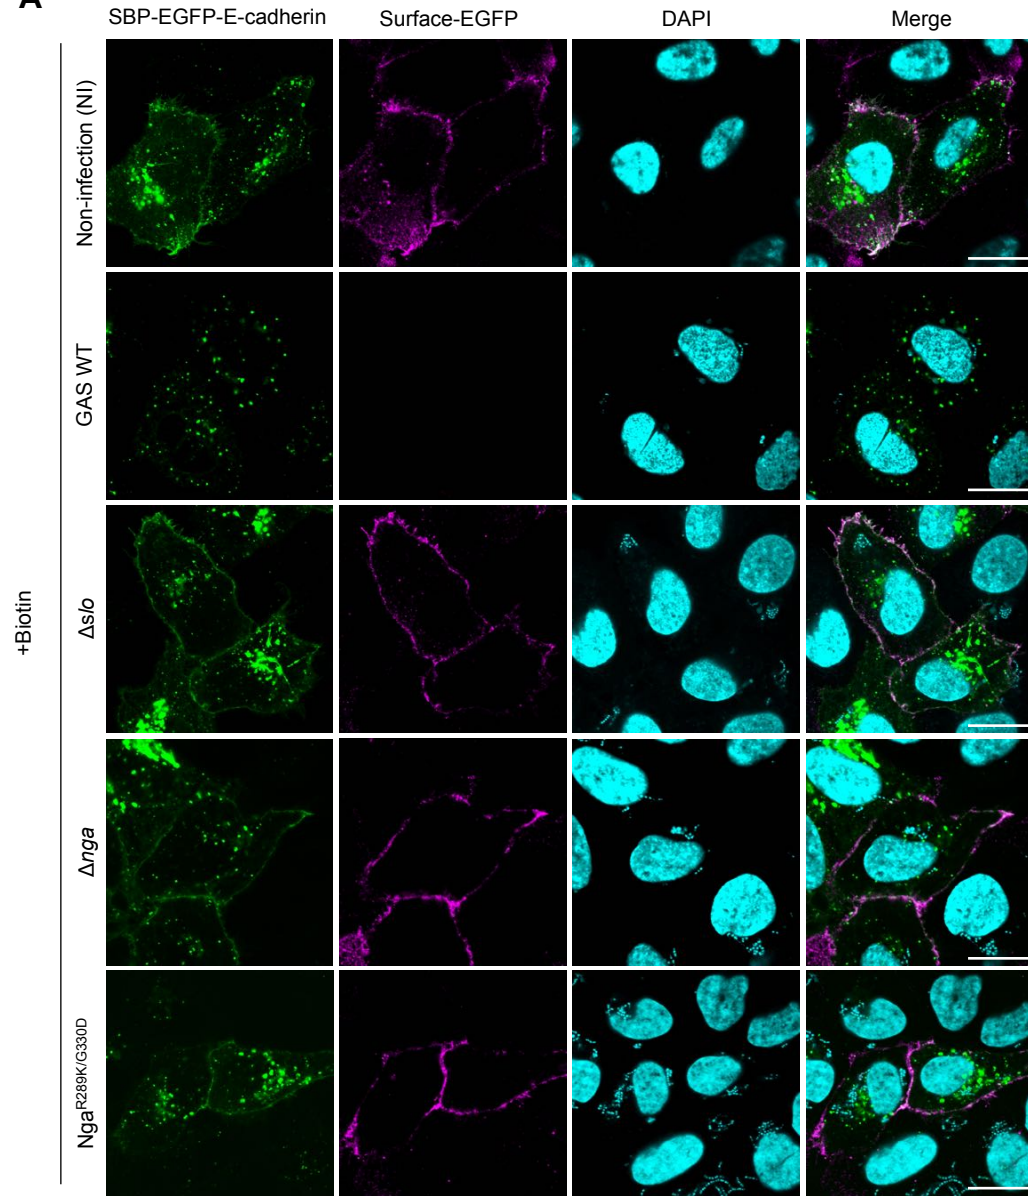

**B**

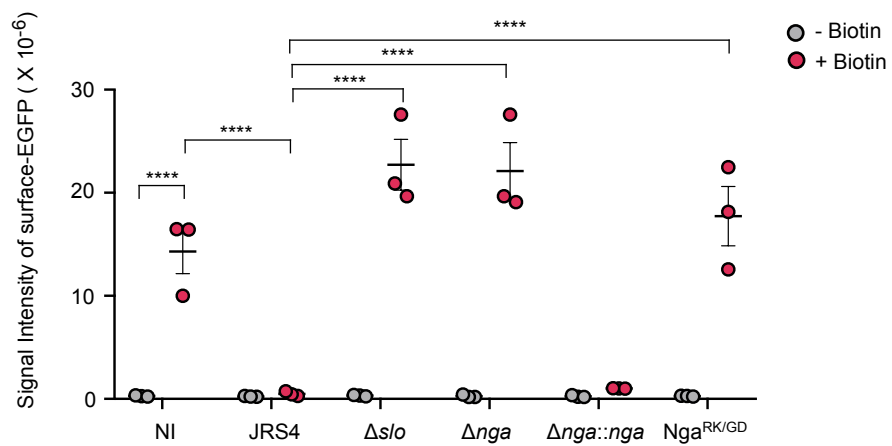

Figure 5

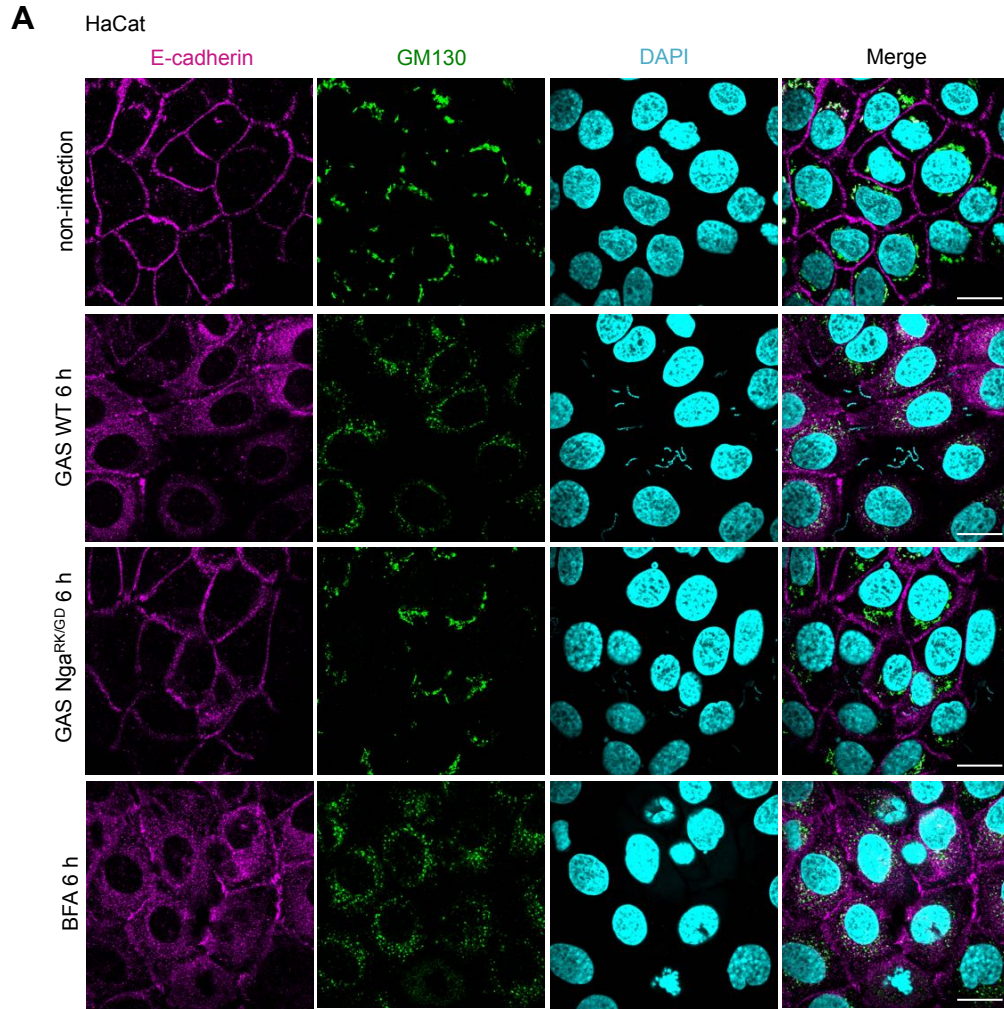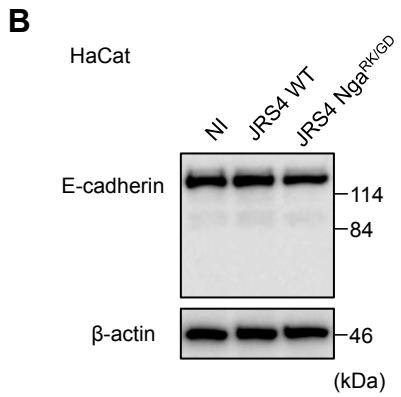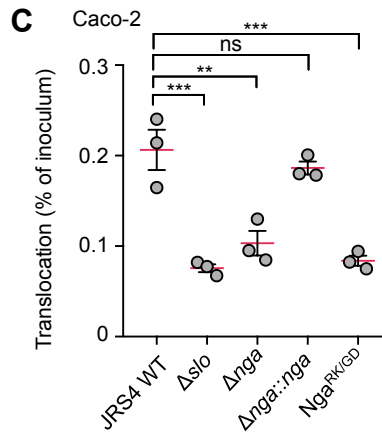

Figure 6

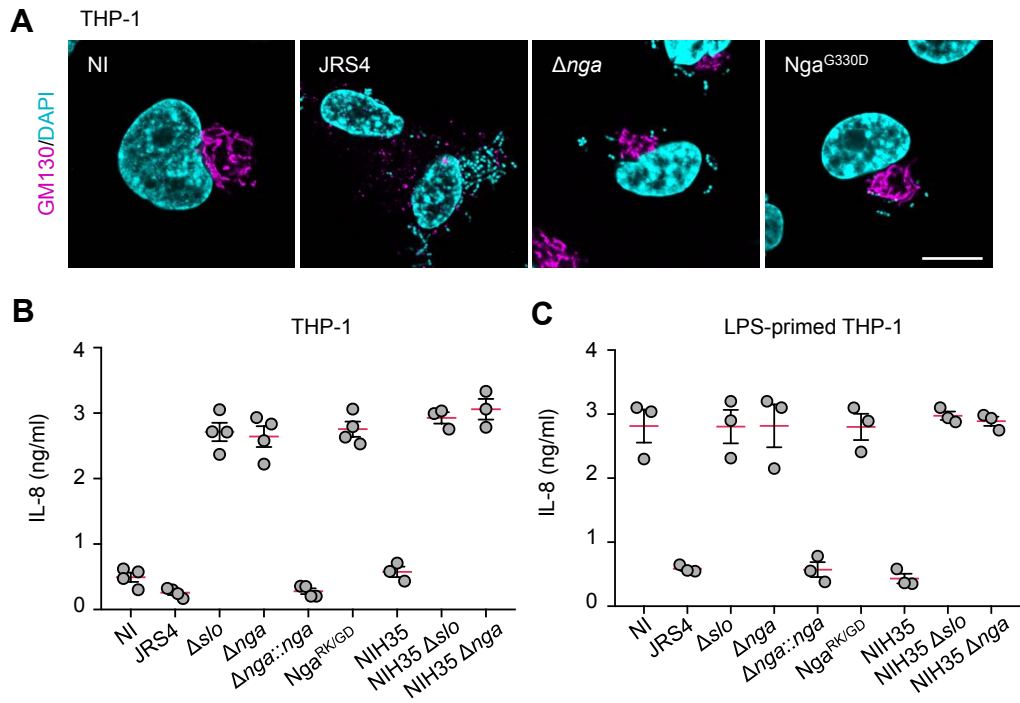

# Supplementary Figure 1

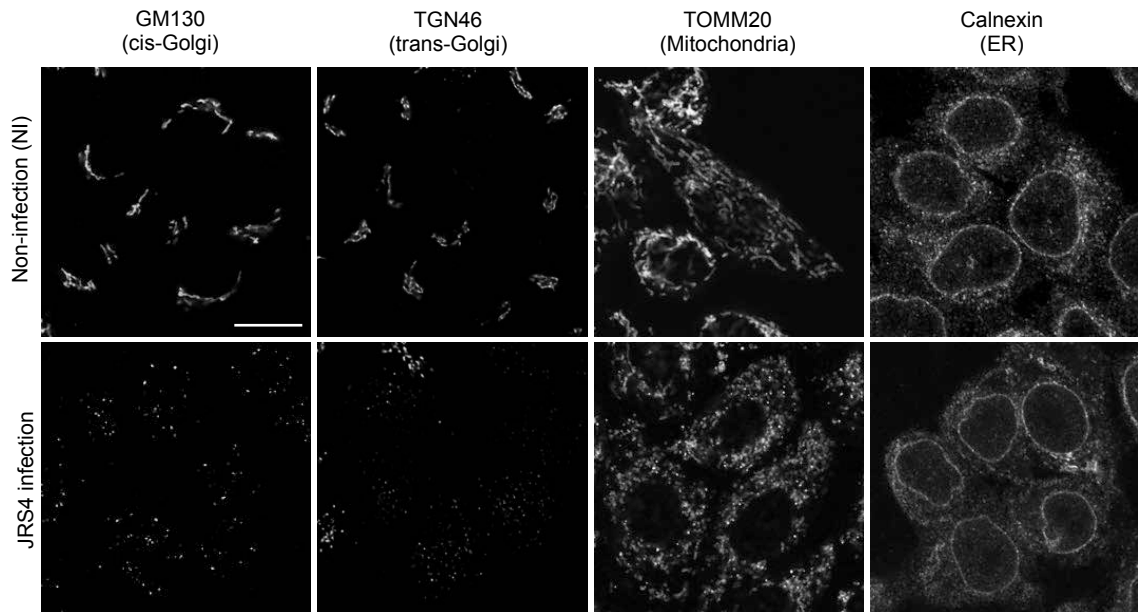

# Supplementary Figure 2

**A**

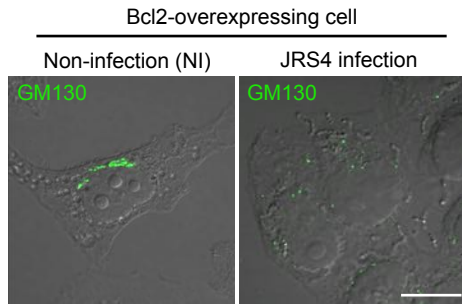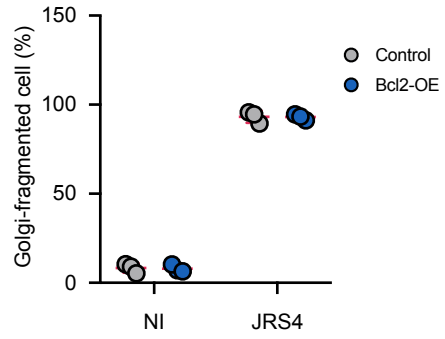

**B**

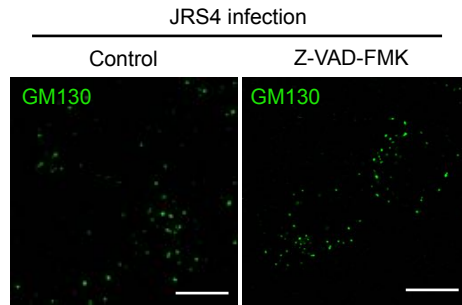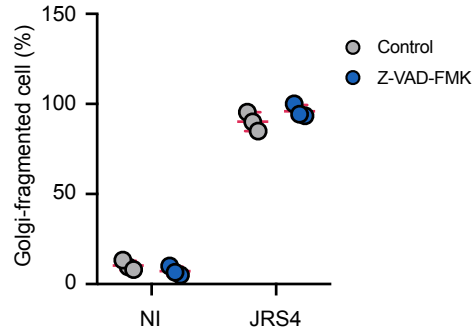

# Supplementary Figure 3

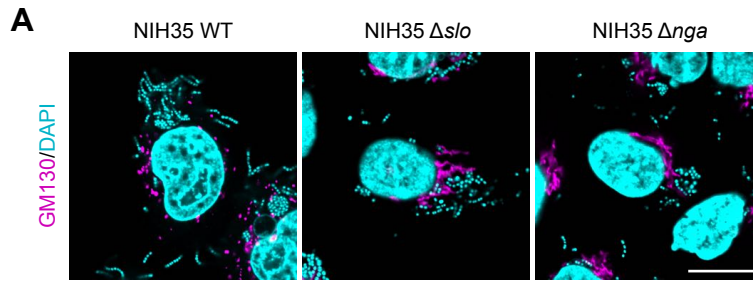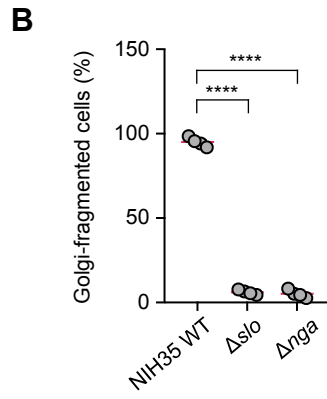



# Supplementary Figure 4

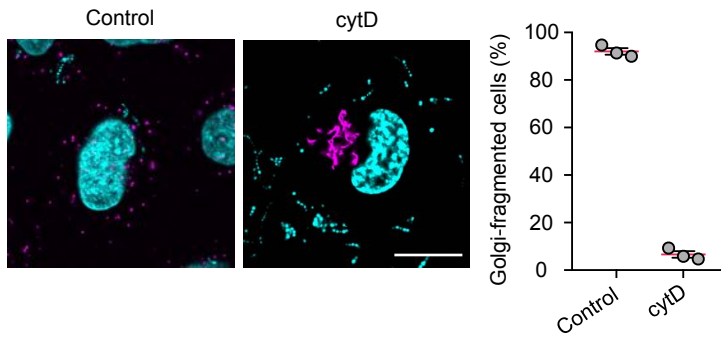

# Supplementary Figure 5

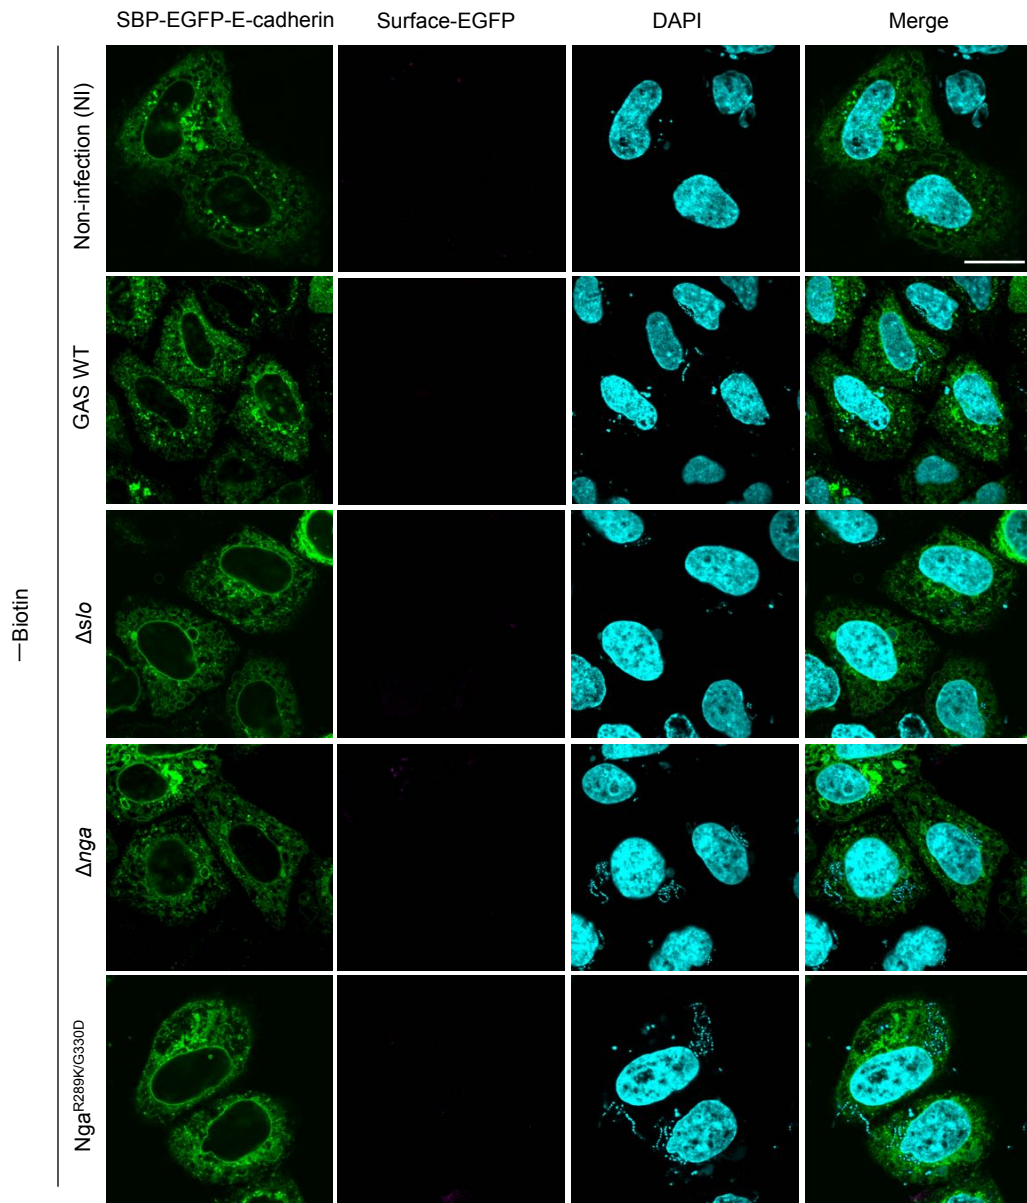

# Supplementary Figure 6

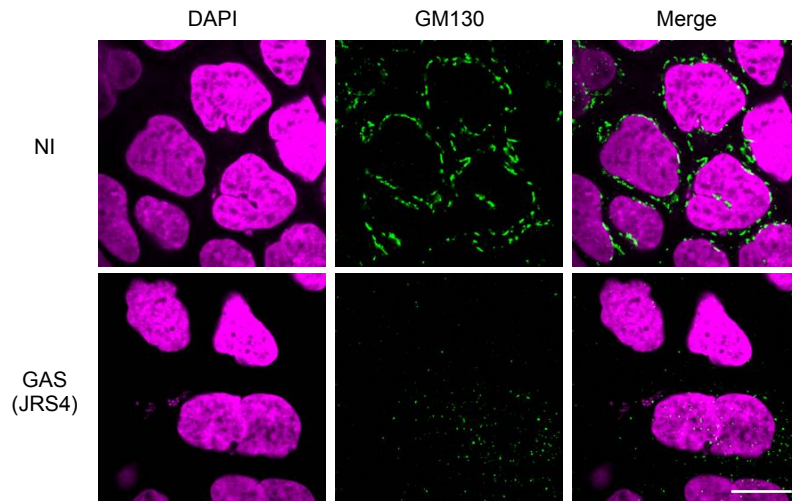

Source: https://www.biorxiv.org/content/10.1101/2020.07.16.207894v1.full.pdf
